# Supplementary figures and images for: Efficient Protein Transduction Method Using Cationic Peptides and Lipids
Source: Hindawi journal article supplement (doi:10.1155/2011/872065), 2011-01-01

Figure S1

A

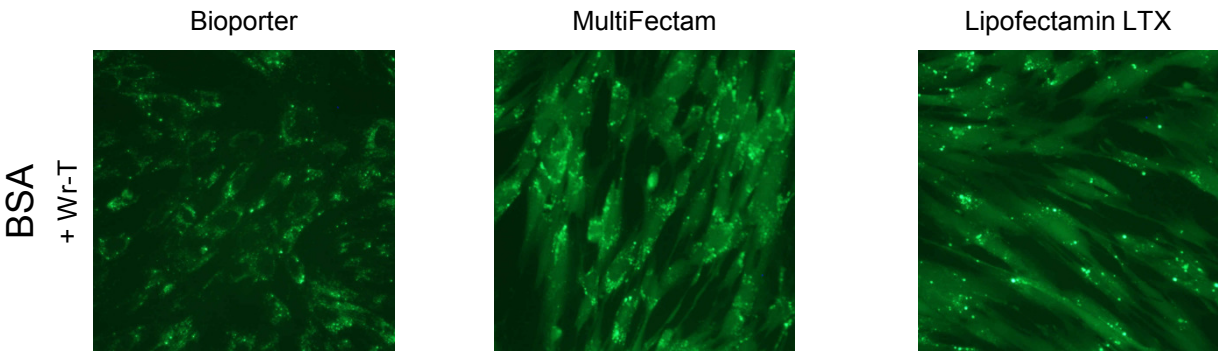

B

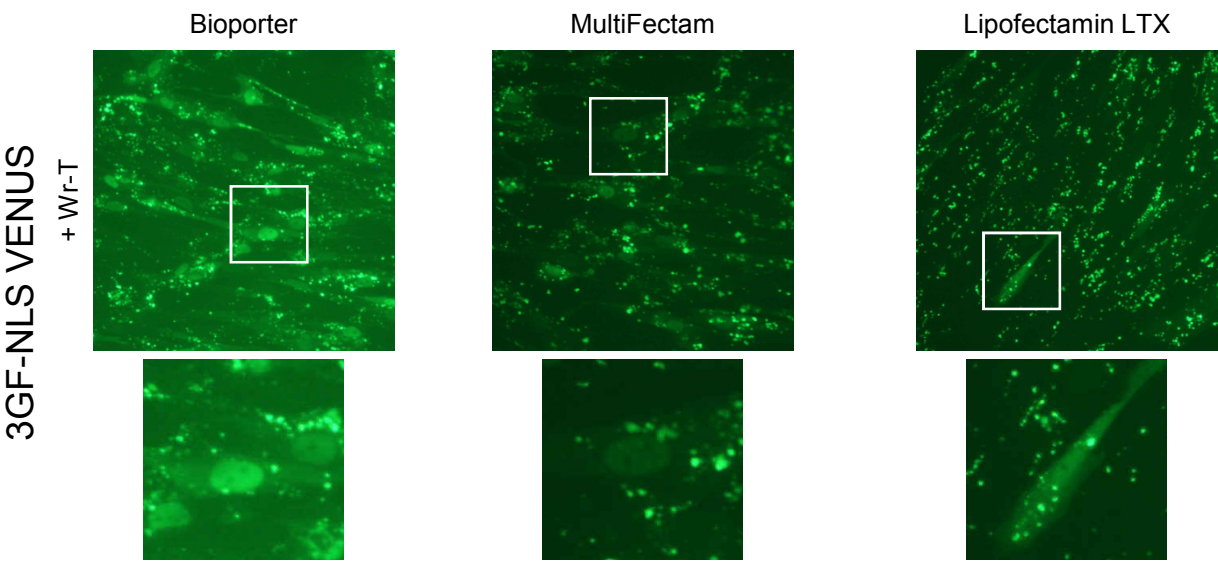

Supplement: f1 [file 872065.f1.pdf]
